# Supplementary material for: Differentiation of single lymphoma primary cells and normal B-cells based on their adhesion to mesenchymal stromal cells in optical tweezers
Source: PubMed Central journal article supplement (PMC6614388; doi:10.1038/s41598-019-46086-y), 2019-07-08
Supplement: 41598_2019_46086_MOESM1_ESM.pdf [file 41598_2019_46086_MOESM1_ESM.pdf]

## Differentiation of single lymphoma primary cells and normal B-cells based on their adhesion to mesenchymal stromal cells in optical tweezers.

Kamila Duś-Szachniewicz<sup>1\*</sup>, Sławomir Drobczyński<sup>2</sup>, Marta Woźniak<sup>1</sup>, Krzysztof Zduniak<sup>1</sup>, Katarzyna Ostasiewicz<sup>3</sup>, Piotr Ziółkowski<sup>1</sup>, Aleksandra K. Korzeniewska<sup>2</sup>, Anil K. Agrawal<sup>4</sup>, Paweł Kołodziej<sup>5</sup>, Kinga Walaszek<sup>1</sup>, Zbigniew Bystydzieński<sup>6</sup> and Grzegorz Rymkiewicz<sup>6</sup>.

<sup>1</sup>Department of Pathology, Wrocław Medical University, Marcinkowskiego 1, 50-368 Wrocław, Poland

<sup>2</sup>Department of Optics and Photonics, Wrocław University of Science and Technology, Faculty of Fundamental Problems of Technology, Wybrzeże Wyspiańskiego 27, 50-370 Wrocław, Poland

<sup>3</sup>Department of Statistics, Wrocław University of Economics, Komandorska 118/120, 53-345 Wrocław, Poland

<sup>4</sup>Division of Pathology, Sokołowski Hospital Wałbrzych, Sokołowskiego 4, 58-309 Wałbrzych, Poland

<sup>5</sup>2nd Department of General and Oncological Surgery, Wrocław Medical University, Borowska 213, 50-556 Wrocław, Poland

<sup>6</sup>Flow Cytometry Laboratory, Department of Pathology and Laboratory Diagnostics, Maria Skłodowska-Curie Institute-Oncology Centre, Wilhelma Konrada Roentgena 5, 02-781 Warsaw, Poland.

\*Corresponding author's e-mail: kamila.dus-szachniewicz@umed.wroc.pl

| No. | Sex/Age | Diagnosis                      | Presentation<br>Extranodal vs<br>Nodal | Material | Site of<br>involvement/<br>Source of FNAB /<br>surgical specimen | Composition of cell suspension by FCM                |
|-----|---------|--------------------------------|----------------------------------------|----------|------------------------------------------------------------------|------------------------------------------------------|
| 1.  | M/50    | <b>DLBCL, NOS,<br/>non-GCB</b> | E                                      | FNAB     | cLN                                                              | 42% of B-NHLs, 55% of T, 2% of M, 1% of NK           |
| 2.  | M/75    | <b>DLBCL, NOS,<br/>non-GCB</b> | E                                      | FNAB     | stT                                                              | 56% of B-NHLs, 3% of B, 26% of T, 3% of NK, 12% of D |
| 3.  | M/39    | <b>DLBCL, NOS<br/>non-GCB</b>  | E                                      | FNAB     | ingLN                                                            | 52% of B-NHLs, 38% of T, 2% of B, 8% of M            |
| 4.  | F/46    | <b>DLBCL, NOS,<br/>GCB</b>     | E                                      | FNAB     | cLN                                                              | 96% of B-NHLs, 3% of T, 1% of NK                     |
| 5.  | F/61    | <b>DLBCL, NOS,<br/>GCB</b>     | E                                      | FNAB     | ingT                                                             | 91% of B-NHLs, 1% of B, 7% of T, 1% of NK            |
| 6.  | F/54    | <b>DLBCL, NOS,<br/>GCB</b>     | N                                      | FNAB     | cLN                                                              | 41% of B-NHLs, 5% of B, 48% of T, 5% of M, 1% of NK  |
| 7.  | F/88    | <b>DLBCL, NOS,<br/>GCB</b>     | N                                      | FNAB     | cLN                                                              | 87% of B-NHLs, 9% of T, 3% of NK, 1% of M            |

|     |      |                                                          |   |      |                    |                                                         |
|-----|------|----------------------------------------------------------|---|------|--------------------|---------------------------------------------------------|
| 8.  | M/62 | <b>DLBCL, NOS, GCB</b>                                   | N | FNAB | cLN                | 63% of B-NHLs, 1% of B, 28% of T, 2% of NK, 6% of M     |
| 9.  | F/55 | <b>DLBCL, NOS, GCB</b>                                   | E | FNAB | abT                | 24% of B-NHLs, 9% of B, 57% of T, 10% of M              |
| 10. | M/44 | <b>DLBCL, NOS, GCB</b>                                   | N | FNAB | cLN                | 34% of B-NHLs, 3% of B, 60% of T, 3% of NK              |
| 11. | F/54 | <b>DLBCL, NOS, non- GCB</b>                              | N | FNAB | abLN               | 50% of B-NHLs, 8% of B, 38% of T, 4% of NK              |
| 12. | M/32 | <b>DLBCL, NOS, intermediate between GCB and non- GCB</b> | N | FNAB | cLN                | 23% of B-NHLs, 3% of B, 65% of T, 5% of NK, 4% of M     |
| 13. | F/61 | <b>DLBCL, NOS, non- GCB</b>                              | N | FNAB | cLN                | 24% of B-NHLs, 7% B, 65% of T, 3% of M, 1% of NK        |
| 14. | F/74 | <b>PCDLBCL leg type,</b>                                 | E | FNAB | skinT of the leg   | 45% of B-NHLs, 3% of B, 23% of T, 15% of M, 14% of NK   |
| 15. | F/73 | <b>PCDLBC, leg type</b>                                  | E | FNAB | skinT of the leg   | 13% of B-NHLs, 58% of T, 19% of NK, 10% of M            |
| 16. | F/84 | <b>HGBL, NOS, between GCB and non- GCB</b>               | E | FNAB | nasal cavityT      | 44% of B-NHLs, 2% B, 41% of T, 9% of NK, 4% of M        |
| 17. | M/37 | <b>HGBL, NOS, GCB</b>                                    | N | FNAB | cLN                | 66% of B-NHLs, 1% of B, 28% of T, 5% of NK              |
| 18. | M/59 | <b>HGBL, NOS, GCB</b>                                    | E | FNAB | st of left forearm | 75% of B-NHLs, 5% of B, 12% of T, 5% of M, 3% of NK     |
| 19. | M/71 | <b>HGBL, NOS, non- GCB</b>                               | E | FNAB | stT                | 70% of B-NHLs, 23% of T, 4% of NK, 3% of M              |
| 20. | M/60 | <b>HGBL, NOS</b>                                         | E | FNAB | skinT              | 97% of B-NHLs, 2.5% of T, 0.5% of NK                    |
| 21. | F/70 | <b>FL</b>                                                | E | FNAB | abT                | 86% of B-NHLs, 5% of B, 8% of T, 1% of NK               |
| 22. | F/79 | <b>FL</b>                                                | N | FNAB | abLN               | 65% of B-NHLs, 4% of B, 30% of T, 1% of NK              |
| 23. | F/49 | <b>FL</b>                                                | N | FNAB | cLN                | 24% of B-NHLs, 3% of B, 67% of T, 3% of M, 3% of NK     |
| 24. | F/66 | <b>FL</b>                                                | N | S    | abLN               | 86% of B-NHLs, 14% of T                                 |
| 25. | M/65 | <b>FL</b>                                                | N | S    | cLN                | 53% of B-NHLs, 46% of T, 1% of NK                       |
| 26. | M/56 | <b>FL</b>                                                | N | FNAB | ingLN              | 42% of B-NHLs, 7% of B, 46% of T, 3% of NK, 2% of M     |
| 27. | M/32 | <b>FL</b>                                                | E | FNAB | abT                | 95% of B-NHLs, 5% of T                                  |
| 28. | M/70 | <b>FL</b>                                                | N | FNAB | cLN                | 53% of B-NHLs, 19% of B, 26% of T, 2% of NK             |
| 29. | F/67 | <b>FL</b>                                                | N | S    | cLN                | 47% of B-NHLs, 14% of B, 37% of T, 1% of NK, 1% of M    |
| 30. | F/86 | <b>MCL</b>                                               | N | FNAB | abLN               | 96% of B-NHLs, 4% of T                                  |
| 31. | F/69 | <b>MCL</b>                                               | N | FNAB | cLN                | 86% of B-NHLs, 0.5% of B, 10% of T, 2.5% of NK, 1% of M |

|     |      |             |    |      |                             |                                                     |
|-----|------|-------------|----|------|-----------------------------|-----------------------------------------------------|
| 32. | M/UK | <b>MCL</b>  | E  | S    | gastric and duodenal mucosa | 95% of B-NHLs, 5% of T                              |
| 33. | F/66 | <b>MCL</b>  | PB | PB   | PB                          | 74% of B-NHLs, 24% of T, 2% of NK                   |
| 34. | M/64 | <b>MCL</b>  | N  | S    | ingLN                       | 94% of B-NHLs, 0.5% of B, 5.5% of T                 |
| 35. | M/21 | <b>BL</b>   | N  | FNAB | axLN                        | 90% of B-NHLs, 3% of B, 6% of T, 1% of NK           |
| 36. | M/54 | <b>BL</b>   | N  | FNAB | cLN                         | 65% of B-NHLs, 2% of B, 23% of T, 6% of NK, 4% of M |
| 37. | M/65 | <b>EMZL</b> | E  | FNAB | breastT                     | 80% of B-NHLs, 18% of T, 2% of NK                   |

**Supplementary Table 1.** Clinicopathological patients data of samples analysed by the optical tweezers. Abbreviation: F= female; M= male; UK=unknown; DLBCL, NOS= diffuse large B-cell lymphoma, not otherwise specified; GCB= germinal centre B-cell type; non-GCB= non-germinal centre B-cell type; FL= follicular lymphoma; HGBL= high grade B-cell lymphoma; MCL= mantle cell lymphoma; BL= Burkitt lymphoma; PCDLBCL= primary cutaneous diffuse large B-cell lymphoma; EMZL= extranodal marginal zone lymphoma; E= extranodal; N= nodal; FNAB= fine needle aspiration biopsy; S= surgically removed material; LN= lymph node; T= tumour; c= cervical; ax= axillary; ab= abdominal; ing= inguinal; st= soft tissue; PB= peripheral blood; FCM= flow cytometry analysis; B-NHLs= B-cell non-Hodgkin lymphoma cells; NK= natural killer lymphocytes; B= normal B-lymphocytes; T= normal T-lymphocytes; M= macrophages; D= debris.

| No. | Sex/Age | Diagnosis                | Material | Site of involvement/ Source of surgical or FNAB specimen |
|-----|---------|--------------------------|----------|----------------------------------------------------------|
| 1.  | F/82    | Cholecystitis acute      | S        | common bile duct area                                    |
| 2.  | F/76    | Cholecystitis acute      | S        | common bile duct area                                    |
| 3.  | F/65    | Cholecystitis acute      | S        | common bile duct area                                    |
| 4.  | F/80    | Cholecystitis acute      | S        | common bile duct area                                    |
| 5.  | M/65    | Chronic colitis          | S        | abLN                                                     |
| 6.  | F/45    | Chronic colitis          | S        | abLN                                                     |
| 7.  | M/29    | Reactive lymphadenopathy | FNAB     | cLN                                                      |
| 8.  | F/51    | Reactive lymphadenopathy | FNAB     | femoral LN                                               |
| 9.  | F/58    | Reactive lymphadenopathy | FNAB     | cLN                                                      |
| 10. | M/43    | Reactive lymphadenopathy | S        | cLN                                                      |
| 11. | M/74    | Reactive lymphadenopathy | FNAB     | ingLN                                                    |

|     |      |                          |      |      |
|-----|------|--------------------------|------|------|
| 12. | F/44 | Reactive lymphadenopathy | S    | cLN  |
| 13. | F/72 | Reactive lymphadenopathy | S    | axLN |
| 14. | M/89 | Reactive lymphadenopathy | FNAB | cLN  |
| 15. | F/44 | Reactive lymphadenopathy | S    | axLN |

**Supplementary Table 2.** Clinicopathological controls data of samples analysed by the optical tweezers. Abbreviation: F= female; M= male; S= surgically removed material; FNAB= fine needle aspiration biopsy; LN= lymph node; c= cervical; ax= axillary; ab= abdominal; ing= inguinal.
